# Supplementary material for: The Glycerol Phosphatase Gpp2: A Link to Osmotic Stress, Sulfur Assimilation and Virulence in Cryptococcus neoformans
Source: Front Microbiol. 2019 Nov 26;10:2728. doi: 10.3389/fmicb.2019.02728 (PMC6901960; doi:10.3389/fmicb.2019.02728)
Supplement: Supplementary file 3 [file Data_Sheet_2.xlsx]

## Sheet: "gpp2-wt"
Supplementary Table 2: List of the up regulated genes in the gpp2D strain.
ID	Basemean	log2FoldChange	adj. p-value	Gene Type	Gene Description
CNAG_06052	5351.30094458141	6.18046095197451	0	protein_coding	galactose-1-phosphate uridylyltransferase
CNAG_07870	60.0345137117616	5.28525974754899	9.62312159078517e-21	protein_coding	hypothetical protein
CNAG_07042	8.69485670833491	4.82035474925255	0.000106876924337689	protein_coding	hypothetical protein
CNAG_04307	1302.6547261308	4.31915691100649	5.39740969648316e-120	protein_coding	Urate oxidase
CNAG_06051	6912.05143366909	4.27288457286788	1.18454346566745e-206	protein_coding	galactokinase
CNAG_07894	5.90810916141164	4.0961248348031	0.000849727463963511	protein_coding	hypothetical protein
CNAG_01542	389.021015709069	4.04842223519473	6.44495912382667e-97	protein_coding	taurine catabolism dioxygenase TauD
CNAG_05079	16.781973253414	3.66849513153792	1.70034370812412e-07	protein_coding	hypothetical protein
CNAG_05333	43.7320899341974	3.28727543454155	9.40443288564864e-16	protein_coding	hypothetical protein
CNAG_03716	1045.86207561295	3.16168673608986	1.25037364926547e-101	protein_coding	pr4/barwin domain protein
CNAG_07456	66.4182259737849	3.114963448987	8.49437045901577e-22	protein_coding	hypothetical protein, hypothetical protein, variant
CNAG_04508	180.886857129101	3.06972674496064	4.24503703926519e-51	protein_coding	hypothetical protein
CNAG_05256	34526.9600966916	3.06855179645898	3.92692509091044e-127	protein_coding	catalase 2
CNAG_00540	47.9270327304149	2.79494215574112	8.72147909069195e-15	protein_coding	pantothenate transporter
CNAG_06448	257.868515922742	2.55270104922591	1.14394234385603e-27	protein_coding	Cystathionine gamma-lyase
CNAG_06347	5481.82619652878	2.54458250312803	5.8007926845695e-53	protein_coding	pr4/barwin domain protein
CNAG_02321	10.337025492332	2.48834932272751	0.000537143648892074	protein_coding	hypothetical protein
CNAG_05258	12.1844274090628	2.44712163303359	0.000101148081121472	protein_coding	glucose-methanol-choline oxidoreductase
CNAG_04798	12888.193654692	2.40042891484676	7.54938805721578e-160	protein_coding	regulatory protein Cys-3
CNAG_06055	420.245893771258	2.35537767846864	9.67834917943704e-41	protein_coding	hypothetical protein
CNAG_06507	81.4685662179346	2.3181156390206	3.78247455275542e-20	protein_coding	hypothetical protein
CNAG_04901	812.060353036156	2.2530294256139	2.25342610694141e-46	protein_coding	hypothetical protein
CNAG_06073	26.3376542808988	2.16188153187358	1.71484503619821e-06	protein_coding	hypothetical protein, hypothetical protein, variant
CNAG_07947	65.2124442095154	2.16186503565726	6.11295580442318e-15	protein_coding	hypothetical protein
CNAG_00908	15.4073829955208	2.15380735088189	6.88264849080547e-05	protein_coding	hypothetical protein
CNAG_05514	41.6024628263315	2.13516086831138	3.15923294440005e-10	protein_coding	hypothetical protein
CNAG_01138	15938.2265332111	2.12257817743065	1.32623930578355e-91	protein_coding	cytochrome c peroxidase, mitochondrial
CNAG_03384	13.9078916879074	2.11838845574468	0.000628706657604926	protein_coding	hypothetical protein
CNAG_03455	385.061636319672	2.11457210144099	9.99396378048057e-42	protein_coding	hypothetical protein, hypothetical protein, variant
CNAG_06099	55.7215697709251	2.0738372435297	1.45013215269888e-12	protein_coding	hypothetical protein
CNAG_07380	3.84447042616278	2.06810754880975	0.0235542161306095	protein_coding	hypothetical protein
CNAG_06346	130.674153341345	2.0257214096875	2.37562384314733e-23	protein_coding	Barwin-like protein 1
CNAG_07993	62.319435066841	2.01849611451472	1.23865395864784e-11	protein_coding	hypothetical protein
CNAG_07837	164.466904474756	2.00843956495937	2.05949456747465e-26	protein_coding	hypothetical protein, hypothetical protein, variant
CNAG_03719	418.223200792435	2.00124493794856	1.06319986620438e-36	protein_coding	hypothetical protein
CNAG_04707	66.5379317919211	1.97304736250521	6.57500360789496e-14	protein_coding	hypothetical protein
CNAG_00867	41.4574477893726	1.95905560474225	6.06688211840377e-09	protein_coding	myo-inositol transporter, putative
CNAG_01760	225.804737041638	1.91147844759308	8.18913002023134e-34	protein_coding	hypothetical protein
CNAG_00597	104.962787927819	1.88570849160234	1.28793297230479e-16	protein_coding	amino acid transporter, amino acid transporter, variant
CNAG_07458	373.608273257107	1.88349096775402	4.93151100669671e-29	protein_coding	hypothetical protein, hypothetical protein, variant
CNAG_00001	32.1193877481793	1.86786612602438	2.90003498154577e-07	protein_coding	hypothetical protein
CNAG_02508	479.436495998875	1.84950605385584	2.68051993636093e-47	protein_coding	hypothetical protein
CNAG_02944	360.564013204508	1.83349772661358	1.11715811260358e-28	protein_coding	phosphate-repressible vacuolar acid phosphatase
CNAG_03389	2369.14401058592	1.81787602999777	8.96004287365015e-66	protein_coding	alpha-ketoglutarate catabolism dioxygenase
CNAG_01497	395.185270107748	1.8163477700213	5.08559056026312e-36	protein_coding	Integral membrane protein
CNAG_00870	171.478514744579	1.77669512248719	1.17616634445685e-19	protein_coding	hypothetical protein, hypothetical protein, variant 1, hypothetical protein, variant 2
CNAG_07840	40.847434832915	1.75944723426239	4.94172443786031e-07	protein_coding	hypothetical protein
CNAG_05154	1473.85894293868	1.74461991184824	1.87181327466384e-58	protein_coding	membrane fraction protein
CNAG_01993	247.708916992735	1.74297256883325	6.58134919943582e-28	protein_coding	hypothetical protein
CNAG_00738	111.869048562931	1.71040762255218	8.81495686183659e-14	protein_coding	hypothetical protein
CNAG_02336	432.899736003612	1.70966515620872	2.91310188493147e-33	protein_coding	hypothetical protein
CNAG_00751	9.85105931161267	1.7063708253157	0.00529476548078534	protein_coding	hypothetical protein
CNAG_02587	461.03866551369	1.69982303407068	3.70946399145234e-36	protein_coding	alfa-L-rhamnosidase
CNAG_01002	471.82356964234	1.68726122087726	4.87842046012907e-28	protein_coding	hypothetical protein
CNAG_03294	277.103254940701	1.68036299909311	4.57577933871843e-25	protein_coding	hypothetical protein
CNAG_00925	210.661397542575	1.67315487597634	5.02986562004547e-26	protein_coding	Identified spore protein 7
CNAG_00903	530.354600294558	1.6710354486721	2.02703772404412e-41	protein_coding	hypothetical protein, hypothetical protein, variant 1, hypothetical protein, variant 2
CNAG_06209	16.7959147625615	1.66738835772376	0.000504328632543877	protein_coding	hypothetical protein
CNAG_06375	125.717295111228	1.66590805866451	1.04007031756326e-15	protein_coding	hypothetical protein
CNAG_01354	628.55290678495	1.66207763582708	3.23155668256794e-26	protein_coding	hypothetical protein
CNAG_06321	78.661701806234	1.66183465686624	2.43626524855117e-11	protein_coding	hypothetical protein, hypothetical protein, variant
CNAG_01883	49.8710268824102	1.6553670498594	5.34924698609009e-06	protein_coding	hypothetical protein
CNAG_03717	198.848202796058	1.64886624210224	5.49029994411851e-23	protein_coding	hypothetical protein
CNAG_02517	108.742826144913	1.64268233203868	7.16800345607652e-15	protein_coding	hypothetical protein
CNAG_00728	422.365578691675	1.62208302261727	9.77219578569975e-37	protein_coding	dityrosine transporter
CNAG_07613	33.425480739307	1.61527332208514	4.50787500670282e-06	protein_coding	hypothetical protein
CNAG_02226	1414.54020348571	1.58286314472474	1.693169322276e-33	protein_coding	hypothetical protein
CNAG_00177	111.250639902108	1.58093600283218	1.01347811577078e-12	protein_coding	hypothetical protein
CNAG_04933	144.392006015992	1.57536189065888	1.75777084782945e-15	protein_coding	hypothetical protein, hypothetical protein, variant 1, hypothetical protein, variant 2
CNAG_07950	40.2891580602161	1.57349634897664	5.70626953728565e-07	protein_coding	hypothetical protein
CNAG_05728	14.5299880145686	1.57204197554036	0.00315263893397577	protein_coding	hypothetical protein
CNAG_07043	556.596659226279	1.55140287171479	7.49581691106529e-36	protein_coding	hypothetical protein
CNAG_00456	4896.43186204966	1.54308287093863	1.42865906990374e-42	protein_coding	Identified spore protein 6
CNAG_06973	111.256121551592	1.53925610989431	6.19658382579446e-12	protein_coding	hypothetical protein
CNAG_04736	112.293268168509	1.52874396851569	5.2948022184842e-13	protein_coding	hypothetical protein
CNAG_01603	1075.1313999168	1.52586335833145	3.84329731938478e-33	protein_coding	hypothetical protein
CNAG_06546	34.0713383993639	1.5230944750491	1.00678715396197e-05	protein_coding	hypothetical protein, hypothetical protein, variant 1, hypothetical protein, variant 2, hypothetical protein, variant 3, hypothetical protein, variant 4
CNAG_04874	277.886714222342	1.50103736716676	9.58712806568293e-14	protein_coding	hypothetical protein
CNAG_07704	41.6829305704044	1.49939476463989	1.89719693358608e-06	protein_coding	hypothetical protein
CNAG_04960	94.4667268029744	1.48600111316502	8.67575242760242e-12	protein_coding	hypothetical protein
CNAG_00919	900.723211702764	1.48279392284195	6.08444058993218e-41	protein_coding	carboxypeptidase D
CNAG_01611	998.48570395686	1.47316740512537	3.83836088885587e-31	protein_coding	infection related protein of unknown function
CNAG_02934	529.63485507485	1.45983276674718	2.01106623897827e-27	protein_coding	hypothetical protein, hypothetical protein, variant
CNAG_01121	226.806835457556	1.45490208648843	2.20581664756188e-18	protein_coding	hypothetical protein
CNAG_00123	446.846029271825	1.4384448150324	7.78424385057107e-32	protein_coding	hypothetical protein
CNAG_01713	3032.94010624594	1.43779740693866	4.9169412774128e-36	protein_coding	hypothetical protein
CNAG_06814	9.97577085726293	1.43445597501392	0.00827840996547894	protein_coding	Alpha cell-type homeodomain transcription factor
CNAG_02893	255.538817297372	1.42600528873064	1.32947944562544e-20	protein_coding	hypothetical protein, hypothetical protein, variant
CNAG_01193	72.7533559750624	1.41254554750465	1.01984446700515e-08	protein_coding	hypothetical protein, hypothetical protein, variant
CNAG_00907	203.727674122503	1.41045919534093	3.07328450946877e-18	protein_coding	hypothetical protein, hypothetical protein, variant
CNAG_03041	67.2626294915991	1.40741329225839	1.86483667502829e-08	protein_coding	hypothetical protein
CNAG_04077	122.642867626486	1.3990590071971	1.23857244274621e-11	protein_coding	hypothetical protein
CNAG_03230	46.6536097768292	1.39610159341045	1.9077152951694e-05	protein_coding	hypothetical protein, hypothetical protein, variant
CNAG_05500	780.217883024587	1.38170343160534	2.68332479676233e-38	protein_coding	hypothetical protein, hypothetical protein, variant
CNAG_00627	127.888964072024	1.38030499307522	5.42260562627741e-12	protein_coding	specific transcriptional repressor
CNAG_08005	155.130682767272	1.3720329228776	2.84492468717257e-15	protein_coding	hypothetical protein
CNAG_03145	32.2965820559404	1.36027715958387	9.99128414191692e-05	protein_coding	hypothetical protein
CNAG_05458	277.291129546754	1.35484794658556	8.06268097047404e-16	protein_coding	endo-1,3(4)-beta-glucanase
CNAG_00164	82.9341092690687	1.35293959067248	7.14711649475545e-08	protein_coding	hypothetical protein
CNAG_01562	7139.54045867613	1.35266185879651	3.67550995849824e-36	protein_coding	pr4/barwin domain protein
CNAG_01498	768.454677210944	1.35202045282399	9.52344338603965e-34	protein_coding	Arylsulfatase
CNAG_04623	74.8858507676732	1.33657799635705	1.66038220426453e-08	protein_coding	hypothetical protein
CNAG_07909	52.4351155235564	1.33318174680499	6.47186180841615e-06	protein_coding	meiotic recombinase Dmc1
CNAG_07611	8.38876567116908	1.31957573869468	0.0211998783323287	protein_coding	hypothetical protein
CNAG_02090	996.687166016177	1.31709072077107	1.28522155990222e-30	protein_coding	guanine nucleotide-binding protein G(o) subunit alpha
CNAG_06115	169.226565498508	1.31595025628596	2.8588215149162e-13	protein_coding	Acid phosphatase
CNAG_07762	9.68978701941451	1.30484337007487	0.0141716409312065	protein_coding	hypothetical protein
CNAG_01963	126.337277173373	1.30323850426542	9.92387871204978e-11	protein_coding	CMP/dCMP deaminase zinc-binding protein
CNAG_07335	811.096674189619	1.3006910927951	1.03287373967645e-35	protein_coding	cystinosin
CNAG_06307	84.0159561732168	1.29964233412473	1.05322290382804e-08	protein_coding	hypothetical protein
CNAG_02718	874.306000855911	1.29809664471833	1.75345328059259e-29	protein_coding	NAD binding dehydrogenase
CNAG_04869	581.099931618519	1.29441198844442	2.37435865258336e-26	protein_coding	para-nitrobenzyl esterase
CNAG_06213	2784.39401390859	1.28851342854879	2.54101286313361e-47	protein_coding	hypothetical protein
CNAG_01401	39.7023040983566	1.28820460315114	6.20709595762208e-05	protein_coding	hypothetical protein
CNAG_02867	951.068838763645	1.28120561079953	2.53224213717383e-30	protein_coding	phosphatidylinositol phospholipase C, delta
CNAG_07969	46.2976460737692	1.26845485366125	9.17243211370463e-06	protein_coding	hypothetical protein
CNAG_06807	145.860382248083	1.26813718664487	3.54772005363001e-12	protein_coding	hypothetical protein
CNAG_00876	1360.37848424501	1.26806578853584	1.67882295677071e-21	protein_coding	ferric-chelate reductase
CNAG_02777	610.928982262335	1.267255937511	3.70552708345064e-24	protein_coding	phosphate:H symporter, phosphate:H symporter, variant
CNAG_07797	481.433923876234	1.25322809148124	2.26653522554134e-24	protein_coding	transcriptional regulator, transcriptional regulator, variant
CNAG_07990	476.329554060874	1.25197880850731	3.53818963420237e-16	protein_coding	hypothetical protein
CNAG_05660	863.076352028738	1.25122476596201	2.65499958651574e-21	protein_coding	hypothetical protein
CNAG_05685	2778.79787086365	1.24830806777159	4.41565358717493e-38	protein_coding	neutral amino acid transporter
CNAG_00247	475.616227897786	1.24427998009957	1.05228089638675e-16	protein_coding	alpha-aminoadipic semialdehyde synthase
CNAG_00242	8.132482828562	1.23797009690534	0.0193552447687171	protein_coding	hypothetical protein
CNAG_04553	34.7057517973194	1.23281843212017	0.000256623926835271	protein_coding	hypothetical protein
CNAG_01118	150.267769546802	1.22741115740975	3.73331538354774e-11	protein_coding	AAT family amino acid transporter
CNAG_07972	574.435211371338	1.22219332934179	5.15414234523957e-26	protein_coding	hypothetical protein
CNAG_02744	423.046036000713	1.22054335069219	7.21956403203352e-16	protein_coding	hypothetical protein
CNAG_06020	27.5432413406339	1.2159404450312	0.000967441432169138	protein_coding	hypothetical protein
CNAG_01992	45.9319195759352	1.21538102760896	3.36853499549289e-05	protein_coding	hypothetical protein
CNAG_06294	1408.54127461732	1.21183440010068	1.21166871035148e-14	protein_coding	hypothetical protein
CNAG_01075	45.837898762732	1.2108808004492	3.606248398826e-05	protein_coding	methylmalonate-semialdehyde dehydrogenase (acylating)
CNAG_05020	211.678860862421	1.19934656213444	1.66124457069487e-12	protein_coding	NAD-binding Rossmann fold oxidoreductase
CNAG_02202	1833.69016206404	1.19933396481248	3.1298613568819e-23	protein_coding	Adenylylsulfate kinase
CNAG_04911	296.932021839551	1.17628436524934	1.13688434783394e-17	protein_coding	hypothetical protein, hypothetical protein, variant
CNAG_01055	3273.96521320151	1.17124964461647	1.55292897252167e-23	protein_coding	phospholipid transporter, phospholipid transporter, variant
CNAG_07973	187.957110155206	1.17068644478286	5.90355301591292e-10	protein_coding	hypothetical protein
CNAG_07313	121.858270945484	1.16907955839767	1.35657745343292e-08	protein_coding	hypothetical protein
CNAG_03848	361.606910989594	1.16860016672431	1.43055304860736e-15	protein_coding	glutathione transferase, glutathione transferase, variant
CNAG_01683	16198.1044596471	1.16841727692679	8.64709793465776e-12	protein_coding	Monosaccharide transporter
CNAG_00979	9758.75125208921	1.16559248289264	3.93717638755566e-29	protein_coding	Copper uptake transporter
CNAG_06498	961.848371434978	1.16519731095598	7.00850054923415e-23	protein_coding	hypothetical protein
CNAG_06349	25.0438964139869	1.15750348243245	0.00178110179512888	protein_coding	hypothetical protein
CNAG_06695	356.851832379023	1.15691037772893	2.20275647048081e-14	protein_coding	hypothetical protein
CNAG_00284	257.936946044478	1.14256756654423	1.42753514718099e-13	protein_coding	efflux protein EncT, efflux protein EncT, variant
CNAG_05673	969.663208946771	1.14167082386265	2.24900608565962e-22	protein_coding	GPI inositol-deacylase, GPI inositol-deacylase, variant
CNAG_07702	146.237384887496	1.14008444000824	8.65845883919678e-11	protein_coding	hypothetical protein
CNAG_02681	842.524033365018	1.13727915546331	1.51661901070276e-22	protein_coding	Phytase
CNAG_03650	26.3274875109922	1.13378226343716	0.00148503259576614	protein_coding	hypothetical protein
CNAG_07755	312.160626269205	1.1277824017582	6.05203669627676e-12	protein_coding	hypothetical protein, hypothetical protein, variant 1, hypothetical protein, variant 2
CNAG_03480	791.13370603651	1.12658650893958	4.85124416802035e-22	protein_coding	hypothetical protein
CNAG_04951	3388.19703876743	1.12617679982902	3.47387887533187e-21	protein_coding	3-deoxy-7-phosphoheptulonate synthase
CNAG_01749	173.190464098278	1.11995805747224	3.77736402613763e-10	protein_coding	hypothetical protein
CNAG_07466	375.238472043469	1.11777249449167	1.98057048601685e-10	protein_coding	U3 small nucleolar RNA-associated protein 7, U3 small nucleolar RNA-associated protein 7, variant 1, U3 small nucleolar RNA-associated protein 7, variant 2
CNAG_04337	38.7846279079353	1.11087750270366	0.000231909120481966	protein_coding	cation diffusion facilitator
CNAG_02752	981.478687288809	1.11006059523534	2.7502987153328e-23	protein_coding	Short-chain dehydrogenase
CNAG_01560	121.31829680018	1.10929461735405	2.06108685314052e-08	protein_coding	hypothetical protein
CNAG_00735	712.770716248696	1.10643131606293	1.62179700168083e-13	protein_coding	aldehyde dehydrogenase family 7 member A1
CNAG_04474	344.951770552211	1.10616556767364	1.22339886821598e-16	protein_coding	monocarboxylic acid transporter
CNAG_00917	2021.9438364519	1.10577276497696	1.54787490267798e-32	protein_coding	alkylbase DNA N-glycosylase
CNAG_07444	59.0145716840982	1.10545666677669	6.18029957765765e-05	protein_coding	hypothetical protein
CNAG_03233	172.161817143324	1.1045358218183	2.36070869405709e-10	protein_coding	hypothetical protein
CNAG_02176	2204.54343199232	1.10323662381576	1.00129028320296e-23	protein_coding	hypothetical protein
CNAG_06786	190.795849796057	1.1002046480975	8.93623179353188e-11	protein_coding	hypothetical protein
CNAG_00542	245.857509580874	1.09724793869842	1.72378764179589e-14	protein_coding	Salicylate hydroxylase
CNAG_02540	490.12749501829	1.0928325805902	4.53625624647361e-21	protein_coding	hypothetical protein
CNAG_04756	71.4030132279669	1.0899204426533	5.15413837016601e-06	protein_coding	hypothetical protein
CNAG_02270	387.657917007679	1.08517013013604	1.38450156239438e-17	protein_coding	homoserine O-acetyltransferase
CNAG_05697	429.375121874859	1.0796179398798	8.68747122570703e-12	protein_coding	hypothetical protein
CNAG_01004	736.513213564533	1.07628471187896	2.08193844938953e-17	protein_coding	hypothetical protein, hypothetical protein, variant 1, hypothetical protein, variant 2
CNAG_05078	1380.4073411839	1.07601622291834	1.37731334145342e-27	protein_coding	tRNA `-O-ribosylphosphate transferase, tRNA `-O-ribosylphosphate transferase, variant 1, tRNA `-O-ribosylphosphate transferase, variant 2, tRNA `-O-ribosylphosphate transferase, variant 3
CNAG_04831	198.8880680621	1.0721104968311	1.42210301596967e-07	protein_coding	hypothetical protein
CNAG_03477	80.6664193761584	1.07156308275	3.73675968475396e-06	protein_coding	hypothetical protein
CNAG_02935	958.741289628136	1.07066698251753	4.46905737954282e-25	protein_coding	malonic semialdehyde reductase
CNAG_07486	243.560141443091	1.07030091227714	3.06276819634604e-13	protein_coding	hypothetical protein
CNAG_07540	592.179014053075	1.06774495765252	5.71598812961413e-20	protein_coding	hypothetical protein
CNAG_05180	572.858625329163	1.06697134141845	8.94301629814612e-16	protein_coding	hypothetical protein
CNAG_07917	491.15792748513	1.06363733766759	1.34838602302305e-16	protein_coding	uracil transporter FurD
CNAG_00864	37.0793660744681	1.06121774774998	0.000781527651989144	protein_coding	myo-inositol transporter, putative
CNAG_03838	57.8497784595509	1.06018431310288	0.000122934206872241	protein_coding	hypothetical protein
CNAG_02661	375.079544873994	1.05969747229292	1.74448096681437e-13	protein_coding	Identified spore protein 4
CNAG_00529	131.965421575264	1.05761992961616	5.4639803032066e-08	protein_coding	sulfite transporter
CNAG_05778	572.068625547951	1.05228578013764	2.99593512116574e-15	protein_coding	WSC domain-containing protein, WSC domain-containing protein, variant
CNAG_02548	1065.2864603002	1.0454057300804	7.2184511313749e-20	protein_coding	cobalamin synthesis protein, cobalamin synthesis protein, variant
CNAG_05651	65.0243398168895	1.04475020721571	2.48586250933803e-05	protein_coding	hypothetical protein
CNAG_05911	34.9935869172068	1.04248759523295	0.000863511109062104	protein_coding	hypothetical protein
CNAG_02217	294.452219782222	1.04014302064861	1.85826915927519e-08	protein_coding	Chitin synthase
CNAG_07600	1134.83687110544	1.04004555406166	3.86664442706268e-19	protein_coding	Beta-glucosidase
CNAG_03465	1015.67992000148	1.03895193538668	1.11727786024581e-09	protein_coding	laccase
CNAG_06963	2155.31741168716	1.03742949293939	6.78861987626451e-25	protein_coding	Sugar transporter
CNAG_01796	91.9820796656898	1.03614271425262	1.19028952335573e-06	protein_coding	hypothetical protein, hypothetical protein, variant 1, hypothetical protein, variant 2, hypothetical protein, variant 3
CNAG_06524	32.5171173308283	1.03571107512594	0.00181707826761145	protein_coding	hypothetical protein, hypothetical protein, variant
CNAG_06760	273.075154762484	1.03164570336051	1.61016335149614e-12	protein_coding	hypothetical protein
CNAG_05693	72.3559672644275	1.03120097891051	1.99448071159285e-05	protein_coding	hypothetical protein
CNAG_03898	1018.39004441896	1.0303165559618	1.84192438854637e-18	protein_coding	phosphoadenosine phosphosulfate reductase
CNAG_07803	101.143501471126	1.02927143992255	2.75090512083344e-07	protein_coding	hypothetical protein
CNAG_06956	158.461399736887	1.02633926165463	1.44138103849522e-06	protein_coding	hypothetical protein
CNAG_05018	55.5075753607257	1.02513598478777	8.51885888631853e-05	protein_coding	hypothetical protein, hypothetical protein, variant
CNAG_02910	766.694498431248	1.01841573886996	5.24530266176123e-19	protein_coding	hypothetical protein
CNAG_06610	214.88255263951	1.01492399674868	2.16497226503003e-10	protein_coding	MFS transporter
CNAG_05453	90.2810945488088	1.0136977715009	7.48289285120676e-06	protein_coding	hypothetical protein, hypothetical protein, variant
CNAG_01223	599.739092465784	1.00455110450167	1.70887048887873e-13	protein_coding	hypothetical protein
CNAG_06810	52.790288492402	1.00238300432508	0.000151263216775742	protein_coding	hypothetical protein
CNAG_03772	86.5651525347013	1.0016148997659	3.58728156004124e-05	protein_coding	high-affinity glucose transporter
